# Supplementary material
Source: PubMed Central journal article supplement (PMC7415985)
Supplement: supp_RA120.014072_160425_3_supp_542545_qbf05h.pdf [file supp_RA120.014072_160425_3_supp_542545_qbf05h.pdf]

## Supporting Information

### Characterization of SETD3 methyltransferase mediated protein methionine methylation

Shaobo Dai<sup>1</sup>, Matthew V. Holt<sup>2</sup>, John R. Horton<sup>1</sup>, Clayton B. Woodcock<sup>1</sup>, Anamika Patel<sup>3</sup>, Xing Zhang<sup>1</sup>, Nicolas L. Young<sup>2</sup>, Alex W. Wilkinson<sup>4,\*</sup>, Xiaodong Cheng<sup>1,\*</sup>

<sup>1</sup>Department of Epigenetics and Molecular Carcinogenesis, The University of Texas MD Anderson Cancer Center, Houston, Texas, USA

<sup>2</sup>Verna & Marris McLean Department of Biochemistry & Molecular Biology, Baylor College of Medicine, Houston, TX, USA

<sup>3</sup>Department of Biochemistry, Emory University School of Medicine, Atlanta, GA, USA

<sup>4</sup>Department of Biology, Stanford University, Stanford, CA, USA

The Supporting Information contains Figures S1-S3 and Tables S1-S2.

\*To whom correspondence should be addressed:

AWW (alexw2@stanford.edu); and xcheng5@mdanderson.org

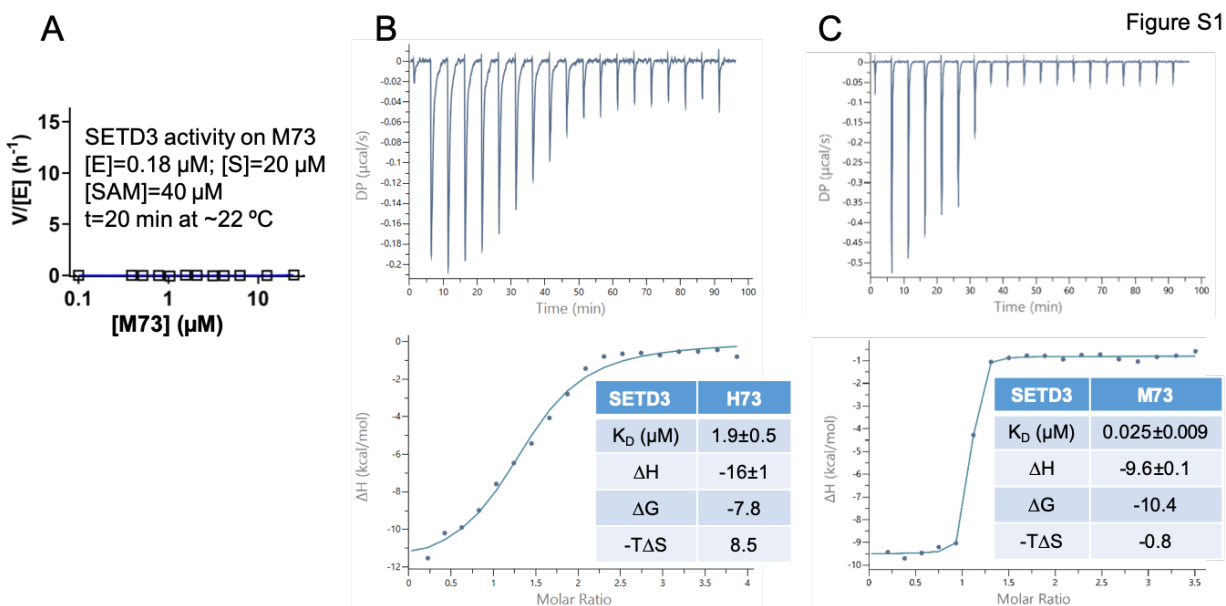

**Figure S1. Related to Figure 2.**

(A) Under the indicated reaction conditions, SETD3 activity on Met<sup>73</sup> is negligible; but Met<sup>73</sup> inhibits SETD3 activity on His<sup>73</sup> (see Fig. 2G). (B-C) ITC experiments of SETD3 against His<sup>73</sup> (B) and Met<sup>73</sup> (C). The derived binding parameters are inserted.

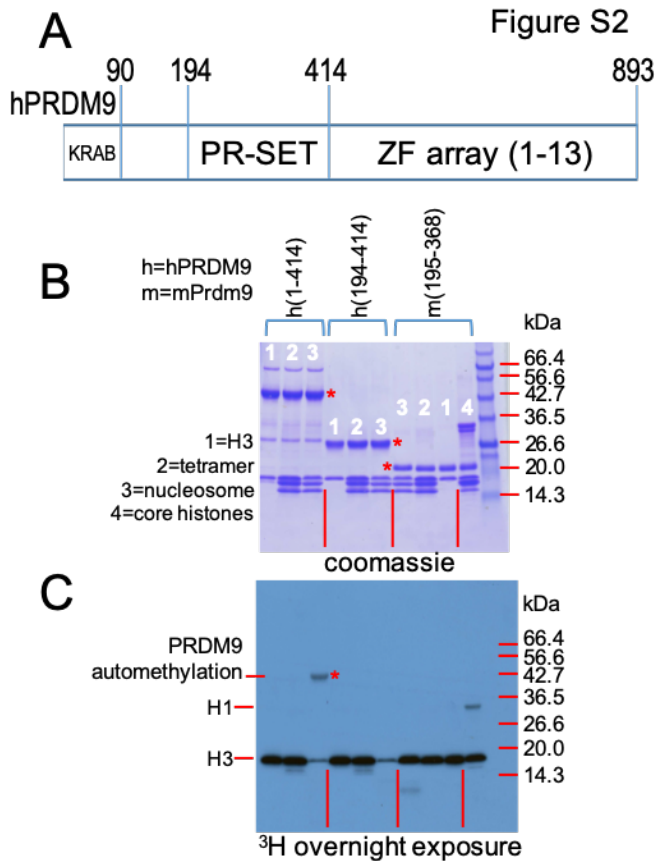

**Figure S2. Related to Fig. 4D. Human PRDM9 automethylation.**

(A) Schematic of human PRDM9, two fragments were generated, residues 1-414 and 194-414.

(B) A 5-25% gradient gel run at 120 V. The reaction conditions were  $[E] = 5 \mu\text{M}$ ,  $[^3\text{H-SAM}] = 5 \mu\text{M}$ ,  $[S] = 3.6 \mu\text{M}$  at 50 mM Tris (pH 8.5), 150 mM NaCl, 5% glycerol, 2 mM DTT and 2 mM  $\text{MgCl}_2$ . The substrates include (1) recombinant H3, (2) H3-H4 and H2A-H2B tetramer, (3) reconstituted mononucleosome, and (4) calf thymus core histones. The reactions proceeded for 1 h at room temperature, and then mixed with 1X loading dye and run on a gradient SDS-PAGE gel. (C) The gel was soaked in an autoradiography enhancer solution for  $\sim 30$  min, dried and exposed to film at  $-80^\circ\text{C}$  for  $\sim 16$ -18 h. The automethylation (indicated by a red \*) was observed for the long fragment (residues 1-414), and only when the lower activity on substrate nucleosome was observed.

Figure S3

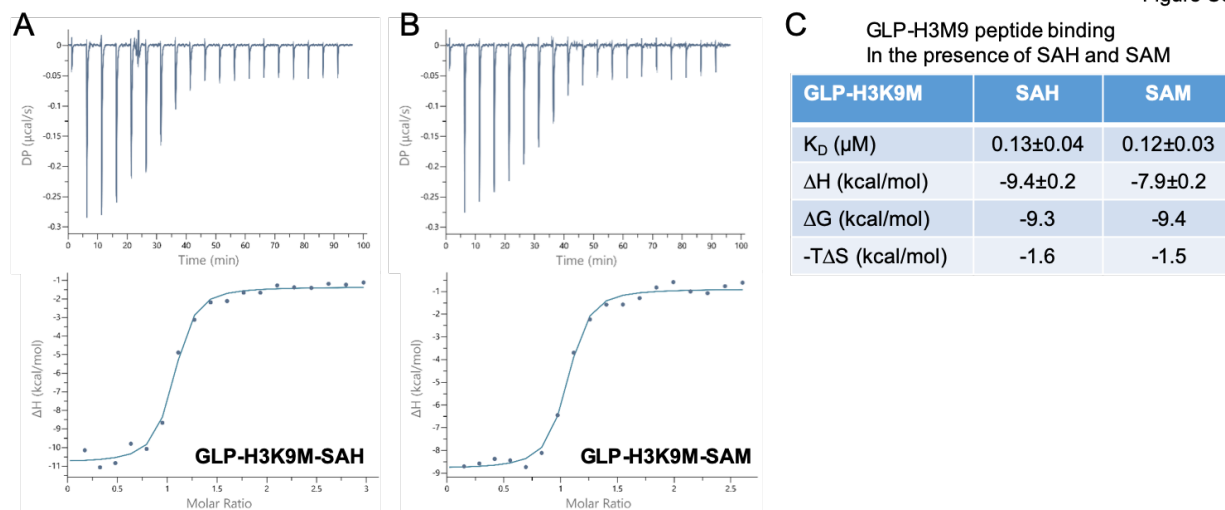

**Figure S3.** ITC experiments of GLP against H3 K9M peptide in the presence of SAH (A) and SAM (B). (C) Summary of ITC parameters.

**Table S1. Summary of X-ray data collection and refinement statistics**

| PDB ID                                                          | 6WK1                      | 6WK2                         |
|-----------------------------------------------------------------|---------------------------|------------------------------|
| SETD3 complex                                                   | WT+Met <sup>73</sup> +SAH | N255V+Met <sup>73</sup> +SAM |
| Space group                                                     | <i>P</i> 2 <sub>1</sub>   | <i>P</i> 2 <sub>1</sub>      |
| Cell dimensions (Å)                                             | 60.3, 175.5, 66.7         | 60.3, 176.0, 66.3            |
| ( $\alpha=\gamma=90^\circ$ )                                    | $\beta=92.3^\circ$        | $\beta=92.6^\circ$           |
| Resolution (Å)                                                  | 35.99-1.89 (1.96-1.89) *  | 36.65-1.76 (1.81-1.76)       |
| <sup>a</sup> R <sub>merge</sub>                                 | 0.072 (0.661)             | 0.062 (0.531)                |
| R <sub>pim</sub>                                                | 0.062 (0.445)             | 0.073 (0.740)                |
| CC <sub>1/2</sub>                                               | 0.986 (0.526)             | 0.993 (0.396)                |
| <sup>b</sup> <I/σI>                                             | 10.2 (1.4)                | 13.8 (1.3)                   |
| Completeness (%)                                                | 93.6 (74.7)               | 94.7 (83.3)                  |
| Redundancy                                                      | 4.7 (2.5)                 | 5.2 (2.9)                    |
| Observed reflections                                            | 479,253                   | 670,276                      |
| Unique reflections                                              | 102,262 (8146)            | 129,205 (11,330)             |
| <b>Refinement</b>                                               |                           |                              |
| Resolution (Å)                                                  | 1.89                      | 1.76                         |
| No. reflections                                                 | 102,199                   | 129,062                      |
| <sup>c</sup> R <sub>work</sub> / <sup>d</sup> R <sub>free</sub> | 0.194 / 0.228             | 0.182 / 0.206                |
| No. Atoms                                                       | (Two complexes)           | (Two complexes)              |
| Protein                                                         | 7767                      | 7668                         |
| Peptide                                                         | 308                       | 292                          |
| SAH/SAM                                                         | 52                        | 54                           |
| Solvent                                                         | 825                       | 765                          |
| B Factors (Å <sup>2</sup> )                                     |                           |                              |
| Protein                                                         | 27.4                      | 30.7                         |
| Peptide                                                         | 32.6                      | 38.1                         |
| SAH/SAM                                                         | 18.8                      | 20.3                         |
| Solvent                                                         | 35.4                      | 40.7                         |
| <b>R.m.s. deviations</b>                                        |                           |                              |
| Bond lengths (Å)                                                | 0.005                     | 0.005                        |
| Bond angles (°)                                                 | 0.8                       | 0.8                          |

\* Values in parenthesis correspond to highest resolution shell.

<sup>a</sup>  $R_{\text{merge}} = \sum |I - \langle I \rangle| / \sum I$ , where I is the observed intensity and  $\langle I \rangle$  is the averaged intensity from multiple observations.

<sup>b</sup>  $\langle I/\sigma I \rangle$  = averaged ratio of the intensity (I) to the error of the intensity (σI).

<sup>c</sup>  $R_{\text{work}} = \sum |F_{\text{obs}} - F_{\text{cal}}| / \sum |F_{\text{obs}}|$ , where F<sub>obs</sub> and F<sub>cal</sub> are the observed and calculated structure factors, respectively.

<sup>d</sup> R<sub>free</sub> was calculated using a randomly chosen subset (5%) of the reflections not used in refinement.

**Table S2. ETD parameters used in HPLC-MS/MS**

|                                                                                  | MS1                                                                                       | MS2 (1)          | MS2 (2)  |
|----------------------------------------------------------------------------------|-------------------------------------------------------------------------------------------|------------------|----------|
| MS resolution setting                                                            | 60,000                                                                                    | 30,000           | 30,000   |
| AGC target                                                                       | 5.0e5                                                                                     | 5.0e5            | 5.0e5    |
| Maximum injection time                                                           | 200 ms                                                                                    | 100 ms           | 100 ms   |
| Scan range ( <i>m/z</i> )                                                        | 400-1500                                                                                  | 150-2000         | 150-2000 |
| ETD Reaction time (ms)                                                           | N/A                                                                                       | 28.87 and 115.47 | 14       |
| ETD target                                                                       | N/A                                                                                       | charge-dependent | 5.0e5    |
| Max reagent injection                                                            | N/A                                                                                       | charge-dependent | 200 ms   |
|                                                                                  |                                                                                           |                  |          |
| Data compliance review                                                           |                                                                                           |                  |          |
| Name of peaklist-generating software                                             | ProSightPC 4.0; ProteinProspector                                                         |                  |          |
| Name of the search engine                                                        | ProSightPC 4.0                                                                            |                  |          |
| Name of sequence database searched                                               | search was against a single peptide                                                       |                  |          |
| Number of entries in the database actually searched                              | no database matching;<br>a single peptide analysis                                        |                  |          |
| Specificity of all proteases used to generate peptides                           | no proteases were used;<br>a synthesized peptide                                          |                  |          |
| Number of missed and/or non-specific cleavages permitted                         | proteolysis not performed                                                                 |                  |          |
| List of all fixed modifications (including residue specificity)                  | No fixed modifications                                                                    |                  |          |
| List of all variable modifications (including residue specificity)               | Methylation on lysines and methionines                                                    |                  |          |
| Mass tolerance for precursor ions                                                | 10 ppm                                                                                    |                  |          |
| Mass tolerance for fragment ions                                                 | 20 ppm                                                                                    |                  |          |
| Threshold score/Expectation value for accepting individual spectra               | Three spectra were manually selected based on precursor mass                              |                  |          |
| Estimation of false discovery rate (FDR) and how calculated (for large datasets) | This was not a large dataset as we only analyzed one peptide and searched for one peptide |                  |          |
